# Supplementary material
Source: PubMed Central journal article supplement (PMC2957268)

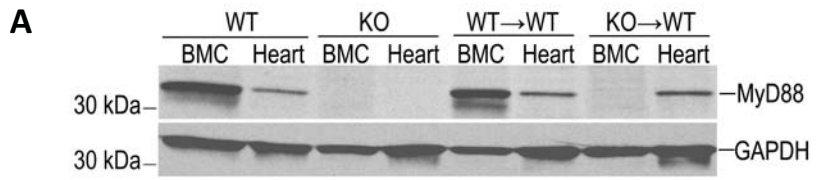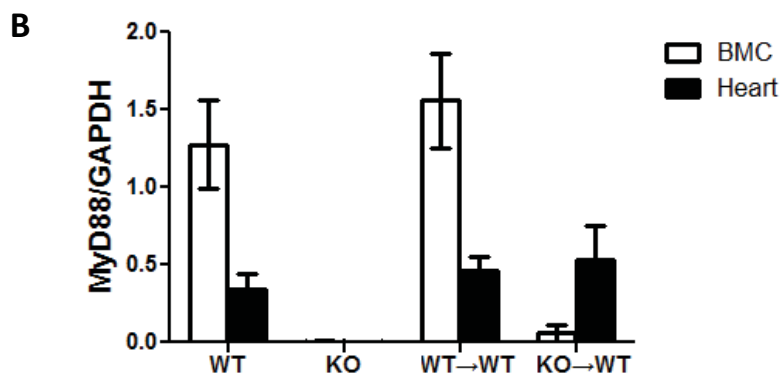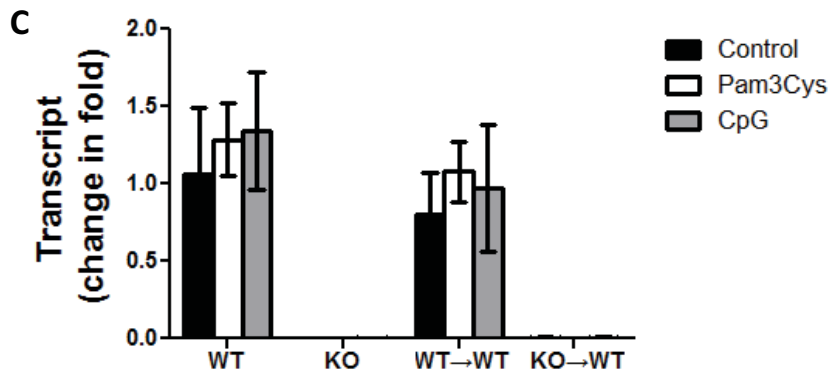

S-Fig. 1

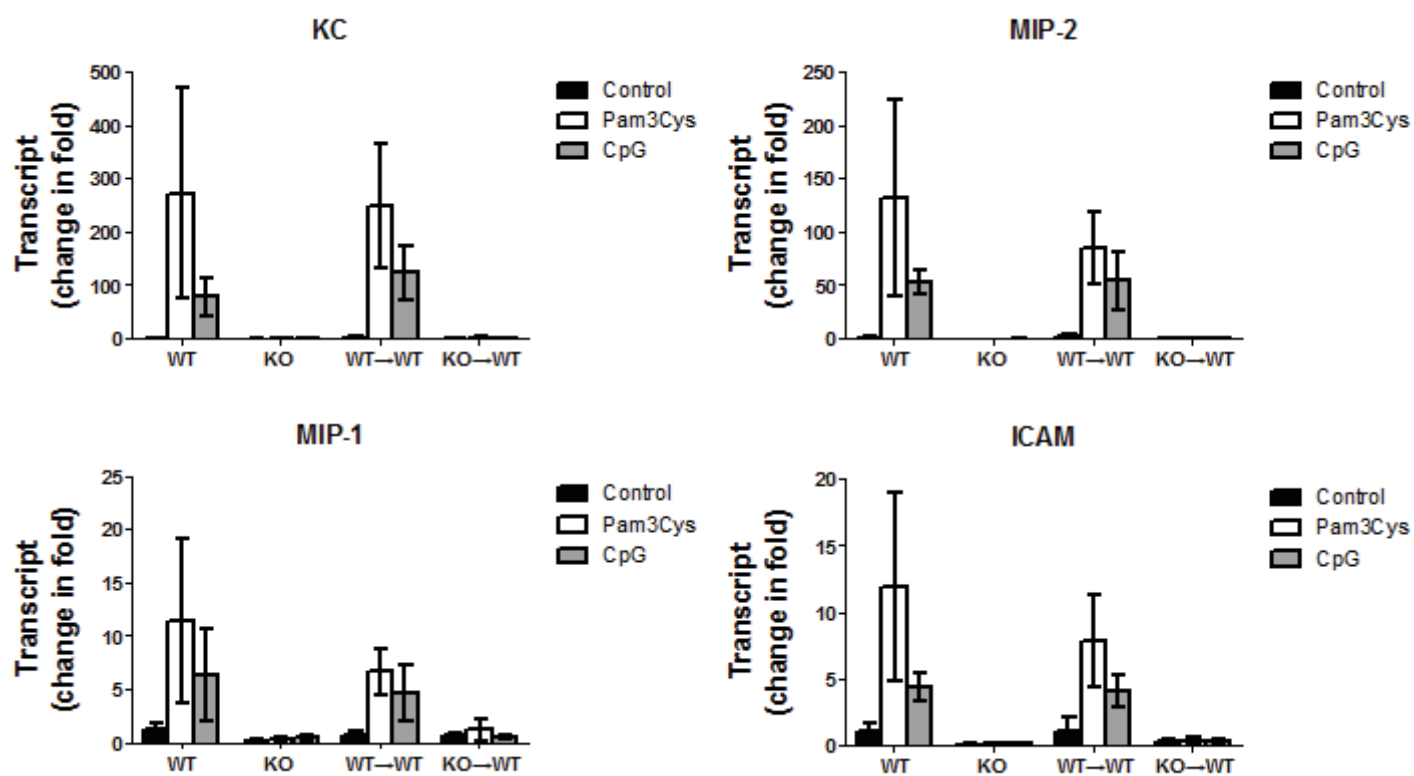

S-Fig. 2

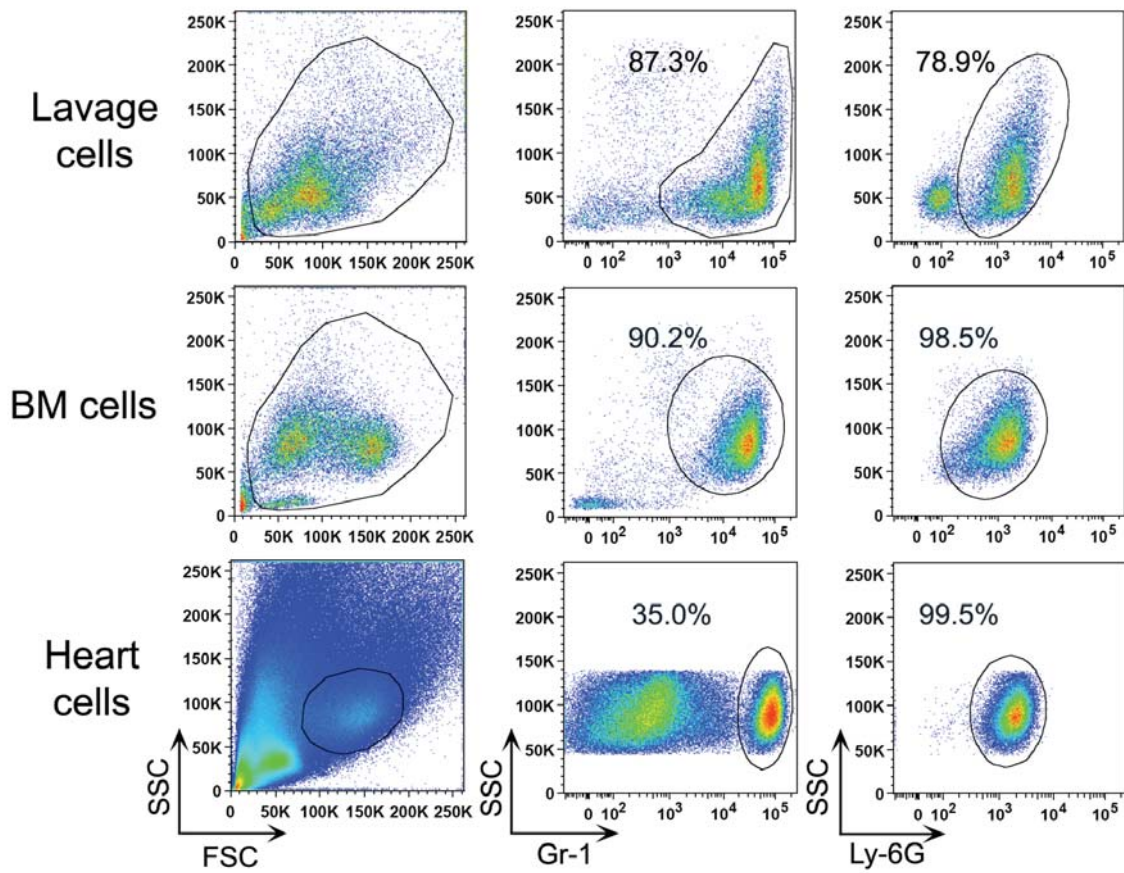

S-Fig. 3

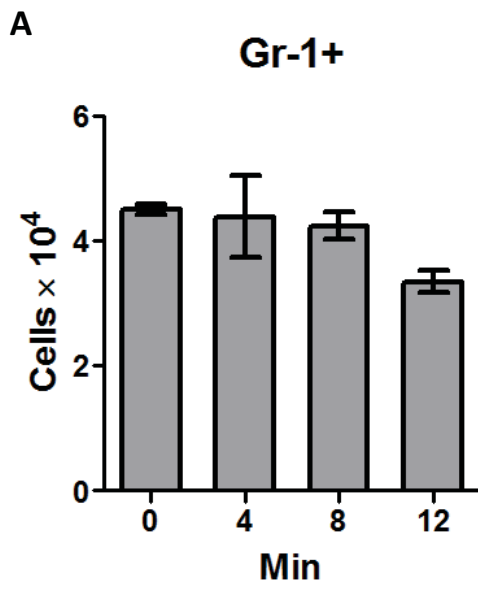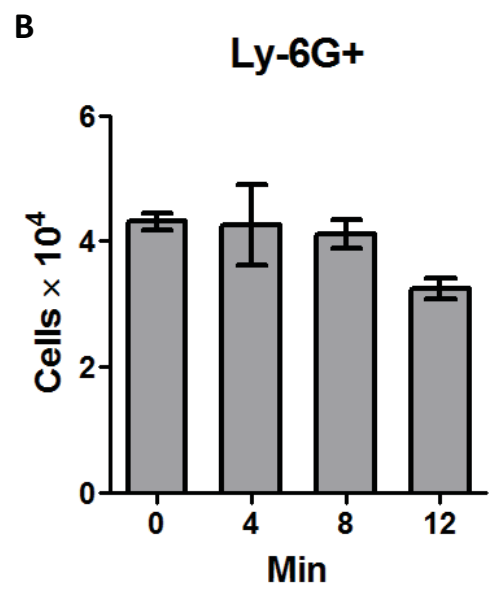

**S-Fig. 4**

Supplement: 00155.2010_1.pdf [file 00155.2010_1.pdf]
